# Supplementary material
Source: Research Square preprint supplement (doi:10.21203/rs.3.rs-8955982/v1)
Supplement: Supplementary file 1 [file 48fc75525b6e1d5a0113b961.pdf]

Table 3. Characteristics of the GOLD diabetes enhanced monitoring pathway (n=172)

|                                                              |                     |
|--------------------------------------------------------------|---------------------|
| Cancer treatment cycles under DP supervision, median [Q1-Q3] | 3 [1-5]             |
|                                                              | range 1-15          |
| Number of phone calls made (n=109), median [Q1-Q3]           | 5 [2-7]             |
|                                                              | range 0-21          |
| CBG readings (n=135) in mmol/L, median [Q1-Q3]               | 8.53 [7.65-9.86]    |
| CBG AM readings (n=132) in mmol/L, median [Q1-Q3]            | 7.43 [6.54-8.46]    |
| CBG PM readings (n=136) in mmol/L, median [Q1-Q3]            | 9.81 [8.44-11.42]   |
| Highest CBG reading (n=138) in mmol/L, median [Q1-Q3]        | 15.00 [12.10-18.70] |
| Referred to diabetes team, n (%)                             | 16 (9%)             |
| Referred from diabetes team, n (%)                           | 11 (6%)             |
| Supported by diabetes team with clinical advice, n (%)       | 18 (10%)            |
| Diabetes advice provided to the patient, n (%)               | 157 (91%)           |
| New diabetes medication intervention needed (n=160), n (%)   | 52 (34%)            |

Abbreviations: AM= morning time; CBG=capillary blood glucose; DP= diabetes pathway;

GOLD=geriatric oncology liaison development; PM=evening time
