# Supplementary material
Source: Research Square preprint supplement (doi:10.21203/rs.3.rs-8955982/v1)
Supplement: Supplementary file 2 [file 4f218f8ec5691e986ef323a5.pdf]

**Improving Diabetes Management in Older Adults with Cancer: A Quality Improvement Project to Enhance Monitoring During Steroid-Based Systemic Anti- Cancer Therapy**

Journal of European Geriatric Medicine

**Author names:** Evelyne Liuu; Rose Evans; Gitanjali Amaratunga, Sarah Compton, Alexandros Georgiou, Tania Kalsi, Yuk-Fun Liu, James Maguire, Clare Nottage, Hannah L. Rush, Carly Welch

**Affiliations and e-mail address of the corresponding author:**

<sup>a</sup> Department of Ageing and Health, 9th Floor North Wing, St Thomas' Hospital, Westminster Bridge, London, SE1 7EH, United Kingdom

<sup>b</sup> Department of Twin Research & Genetic Epidemiology, 3rd Floor D Block South Wing, St Thomas' Campus, King's College London, London, SE1 7EH, United Kingdom

<sup>c</sup> University of Poitiers, INSERM 1402, CHU Poitiers, Centre d'Investigation Clinique, Laboratoire MOVE, department of geriatrics, 2 rue de la Miletrie, 86000 Poitiers, France

[evelyne.liuu@univ-poitiers.fr](mailto:evelyne.liuu@univ-poitiers.fr)

**Supplementary data 1: GOLD enhanced monitoring pathway**

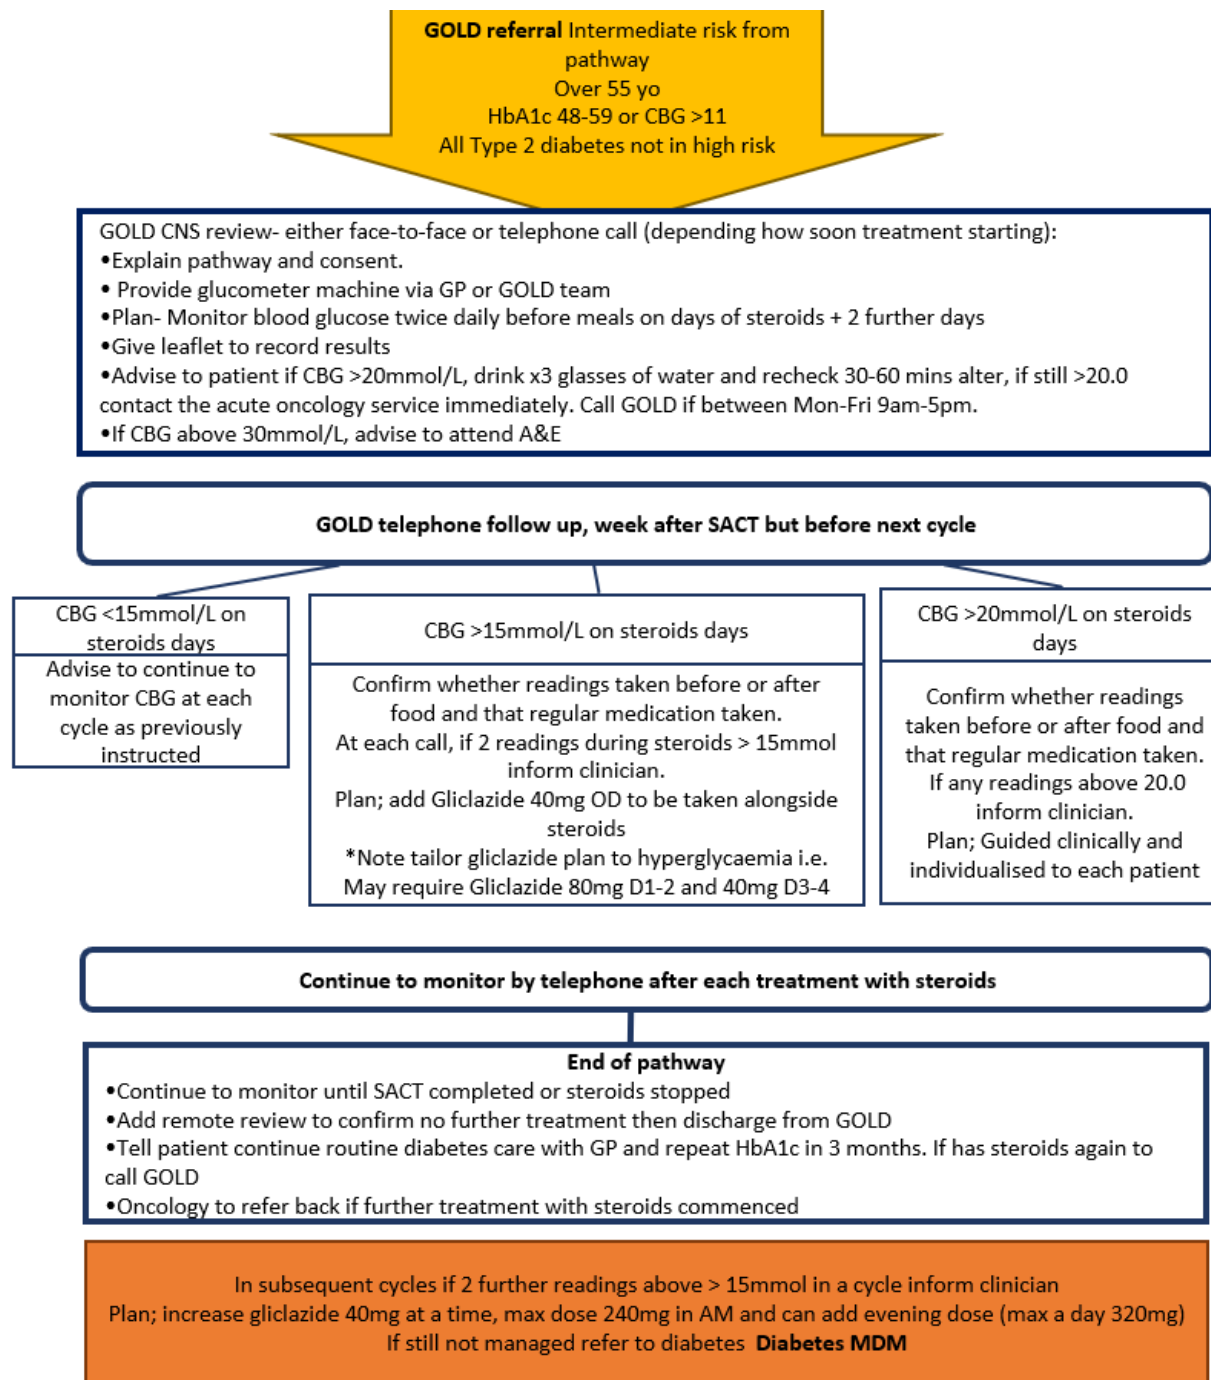

Abbreviations: CBG, capillary blood glucose in mmol/L; GOLD, geriatric oncology liaison development; CNS, clinical nurse specialist; GP, general practitioner; A&E, accident and emergency department; SACT, systemic anticancer therapy; OD, once a day; AM, in the morning; MDM, multidisciplinary meeting.

**Supplementary data 2:** Univariate analysis of overall survival in the GOLD patients according to diabetes medication intervention

| Variables                                      | Univariate analysis<br>HR (95% CI), p-value |
|------------------------------------------------|---------------------------------------------|
| Age in years                                   | 1.03 (1.00-1.07), p =0.07                   |
| <b>Gender (Male vs Female)</b>                 | <b>1.95 (1.02-3.70), p = 0.04</b>           |
| <b>Metastatic status (Y vs N)</b>              | <b>3.06 (1.60-5.86), p &lt; 0.001</b>       |
| Pre-existing diabetes (Y vs N)                 | 0.65 (0.35-1.20), p =0.17                   |
| CFS (per unit)                                 | 1.22 (0.94-1.60), p = 0.14                  |
| <b>Social isolation (Y vs N)</b>               | <b>3.94 (1.37-11.32), p = 0.01</b>          |
| Dependency in ADL (Y vs N)                     | 1.16 (0.42-1.90), p = 0.24                  |
| Timed Get up and Go (per second)               | 1.00 (0.97-1.04), p = 0.70                  |
| History of falls (Y vs N)                      | 2.08 (0.85-5.06), p = 0.11                  |
| Cognitive impairment (Y vs N)                  | 0.74 (0.33-1.68), p = 0.48                  |
| Low mood (Y vs N)                              | 0.77 (0.32-1.85), p = 0.55                  |
| <b>Malnutrition (Y vs N)</b>                   | <b>3.20 (1.61-6.35), p &lt; 0.001</b>       |
| Geriatric interventions other than DP (Y vs N) | 1.79 (0.70-4.59), p= 0.23                   |
| HbA1c at GOLD clinic (per mmol/L)              | 1.02 (1.00-1.04), p = 0.10                  |
| Random CBG in GOLD clinic (per unit)           | 1.00 (0.91-1.09), p = 0.96                  |
| CBG readings (per unit)                        | 1.06 (0.87-1.29), p = 0.57                  |
| CBG AM readings (per unit)                     | 1.07 (0.89-1.30), p = 0.47                  |
| CBG PM readings (per unit)                     | 0.97 (0.81-1.16), p = 0.72                  |
| Highest CBG reading (per unit)                 | 0.96 (0.88-1.05), p =0.32                   |
| Diabetes medication intervention               | 0.72 (0.36-1.43), p =0.35                   |

Abbreviations: ADL= activities in daily living; AM= morning time; CBG=Capillary Blood Glucose; CFS=clinical frailty scale; CI= confidence interval; DP= diabetes pathway; GOLD=geriatric oncology liaison development; HR=hazard ratio; PM=evening time
