# Supplementary material
Source: Research Square preprint supplement (doi:10.21203/rs.3.rs-8955982/v1)
Supplement: Supplementary file 3 [file a158639ad33f57990ed5236f.pdf]

Table 2. Baseline characteristics of the population (n=172)

| Patient characteristics             |                        |
|-------------------------------------|------------------------|
| <b>Demographics</b>                 |                        |
| Age in years, mean $\pm$ SD (range) | 70.9 $\pm$ 8.3 (55-91) |
| Gender Male, n (%)                  | 94 (55%)               |
| Ethnicity, n (%)                    |                        |
| White/                              | 63 (37%)               |
| Black or Black British              | 49 (28%)               |
| Asian or Asian British              | 8 (5%)                 |
| Mixed                               | 5 (3%)                 |
| Others                              | 6 (3%)                 |
| Not stated/no data available        | 41 (24%)               |
| <b>Oncology characteristics</b>     |                        |
| Main tumour sites, n (%)            |                        |
| Oesophagus                          | 21 (12%)               |
| Colon                               | 19 (11%)               |
| Breast                              | 16 (9%)                |
| Myeloma                             | 15 (9%)                |
| Endometrium                         | 14 (8%)                |
| Stomach                             | 13 (8%)                |
| Lung                                | 12 (7%)                |
| Prostate                            | 12 (7%)                |
| Ovary                               | 11 (6%)                |
| Others*                             | 39 (23%)               |
| Metastatic status, n (%)            | 73 (42%)               |

|                                                 |                  |
|-------------------------------------------------|------------------|
| <b>Cancer treatment, n (%)</b>                  |                  |
| Chemotherapy                                    | 135 (78%)        |
| Combination therapy                             | 29 (17%)         |
| Immune monotherapy                              | 6 (3%)           |
| Hormone therapy                                 | 1 (1%)           |
| Best supportive care                            | 1 (1%)           |
| <b>Diabetes characteristics</b>                 |                  |
| Pre-existing diabetes, n (%)                    | 128 (74%)        |
| Diabetes with any vascular complications, n (%) | 45 (35%)         |
| Heart complication                              | 25 (20%)         |
| Renal complication                              | 15 (12%)         |
| Peripheral vascular complication                | 7 (5%)           |
| Diabetic retinopathy                            | 12 (9%)          |
| Diabetic neuropathy                             | 7 (5%)           |
| Initial diabetes treatment, n (%)               |                  |
| Oral monotherapy                                | 64 (50%)         |
| Diet                                            | 32 (25%)         |
| Combination oral therapy                        | 29 (23%)         |
| Insulin therapy                                 | 3 (2%)           |
| HbA1c at GOLD clinic (n=170) in mmol/L          | 51 [47-55]       |
| Random glucose in GOLD clinic (n=143) in mmol/L | 8.00 [6.53-9.90] |
| <b>Geriatric characteristics</b>                |                  |
| GOLD comprehensive geriatric assessment, n (%)  | 131 (77%)        |
| CFS (n=127), median [Q1-Q3]                     | 3 [3-4]          |
| CFS=2                                           | 18 (14%)         |

|                                                                  |                  |
|------------------------------------------------------------------|------------------|
| CFS=3                                                            | 53 (41%)         |
| CFS=4                                                            | 35 (27%)         |
| CFS=5                                                            | 14 (11%)         |
| CFS=6                                                            | 5 (4%)           |
| CFS=7                                                            | 2 (2%)           |
| Social isolation, n (%)                                          | 6 (5%)           |
| Dependency in ADL, n (%)                                         | 13 (10%)         |
| Timed get up and Go (n=91), median in seconds                    | 12.6 [10.2-18.0] |
| History of falls ( $\geq$ one in the previous six months), n (%) | 15 (11%)         |
| Cognitive impairment, n (%)                                      | 27 (21%)         |
| Low mood (anxiety and/or depression), n (%)                      | 33 (25%)         |
| Malnutrition, n (%)                                              | 59 (45%)         |
| GOLD interventions other than DP, n (%)                          | 108 (82%)        |
| Physiotherapy                                                    | 42 (32%)         |
| Occupational therapy                                             | 24 (18%)         |
| Drug management                                                  | 66 (50%)         |
| Diet management                                                  | 71 (54%)         |

\*Other tumour sites: cholangiocarcinoma, n=7; rectum, n=7; lymphoma, n=6; bladder, n=4; head and neck, n=4; anal, n=2; liver, n=2; prostate, n= 2; ampullary, n= 1; cervix, n=1; MGUS, n=1; skin, n=1; unknown, n=1

Abbreviations: ADL=activities of daily livings; CFS=clinical frailty scale; DP=diabetes pathway; GOLD= geriatric oncology liaison development; MGUS=monoclonal gammopathy of Undetermined significance; SD=standard deviation
