# Supplementary material
Source: Research Square preprint supplement (doi:10.21203/rs.3.rs-8955982/v1)
Supplement: Supplementary file 4 [file ad2653e82733d3c1afbb7113.pdf]

Table 1. Iterative refinement of the diabetes enhanced monitoring pathway using PDSA cycles

| <b>PDSA Cycle</b> | <b>Plan</b>                                                                     | <b>Do</b>                                                                   | <b>Study</b>                                                                                     | <b>Act</b>                                                      |
|-------------------|---------------------------------------------------------------------------------|-----------------------------------------------------------------------------|--------------------------------------------------------------------------------------------------|-----------------------------------------------------------------|
| Cycle 1 (2022)    | Implement JBDS-IP guidance for glycaemic monitoring and risk stratification (5) | Applied HbA1c and venous glucose criteria for risk assessment               | Found venous glucose measurement burdensome for oncologists                                      | Adjusted to accept any venous/capillary/at-home glucose reading |
| Cycle 2 (2022)    | Optimise detection of "at-risk" patients                                        | Lowered glucose threshold for referral from 12 to 11 mmol/L                 | Improved detection of intermediate-risk patients                                                 | Maintained new threshold                                        |
| Cycle 3 (2022)    | Tailor pathway by age                                                           | Patients <55 years to diabetes clinic; ≥55 years to GOLD clinic             | Reduced diabetes team burden; improved geriatric management and expertise                        | Formalised age-based referral criteria                          |
| Cycle 4 (2022)    | Anticipate high-risk hyperglycaemia.                                            | Lowered high-risk glucose threshold from 20.1 to 15 mmol/L.                 | Increased early referrals to GOLD and diabetes team to avoid life-threatening complications      | Maintained new threshold                                        |
| Cycle 5 (2023)    | Refine HbA1c referral criteria                                                  | Expanded intermediate-risk HbA1c range from 48-59 to 48-64 mmol/mmol.       | Reduced unnecessary referrals to diabetes team for older individuals; maintained safe management | Updated referral criteria                                       |
| Cycle 6 (2023)    | Broaden high-risk criteria                                                      | Added history of steroid hyperglycaemia as high-risk criteria               | Improved identification of cases who may need complex interventions                              | Updated referral criteria                                       |
| Cycle 7 (2023)    | Empower geriatrics team for medication management                               | Allowed GOLD team to initiate then to escalate gliclazide up to 320mg daily | Demonstrated safe and effective management without the need of diabetes team input.              | Formalised geriatrics-led medication management.                |
