# Supplementary material
Source: Research Square preprint supplement (doi:10.21203/rs.3.rs-8955982/v1)
Supplement: Supplementary file 5 [file fa25e59bfc0423953e9ca73d.pdf]

Table 4. Association among clinical and biological characteristics and diabetes medication intervention in the GOLD patients

| Variables                                     | Diabetes medication required | Diabetes medication not required | P-value |
|-----------------------------------------------|------------------------------|----------------------------------|---------|
| Age in years, mean $\pm$ DS                   | 70.0 $\pm$ 7.8               | 71.4 $\pm$ 8.7                   | 0.32    |
| Sex female, n (%)                             | 32 (20)                      | 43 (27)                          | 0.32    |
| Metastatic status, n (%)                      | 21 (32)                      | 31 (34)                          | 0.03    |
| Pre-existing diabetes, n (%)                  | 44 (37)                      | 8 (19)                           | 0.21    |
| CFS, mean $\pm$ SD                            | 3.59 $\pm$ 1.29              | 3.51 $\pm$ 0.95                  | 0.07    |
| Social isolation, n (%)                       | 1 (25)                       | 38 (33)                          | 0.70    |
| Dependency in ADL, n (%)                      | 4 (31)                       | 35 (33)                          | 0.93    |
| Timed get up and go test (sec, mean $\pm$ SD) | 14.4 $\pm$ 6.0               | 17.4 $\pm$ 13.2                  | 0.55    |
| History of falls, n (%)                       | 6 (43)                       | 33 (32)                          | 0.27    |
| Cognitive impairment, n (%)                   | 4 (17)                       | 31 (34)                          | 0.70    |
| Low mood, n (%)                               | 10 (31)                      | 27 (32)                          | 0.18    |
| Malnutrition, n (%)                           | 16 (30)                      | 16 (35)                          | 0.98    |
| Other holistic interventions (%)              | 33 (33)                      | 8 (32)                           | 0.83    |
| HbA1c at GOLD clinic (mmol/L, mean $\pm$ SD)  | 53.5 $\pm$ 10.9              | 50.8 $\pm$ 8.1                   | 0.99    |

|                                                                  |                  |                  |        |
|------------------------------------------------------------------|------------------|------------------|--------|
| Random CBG in GOLD clinic (mmol/L, mean $\pm$ SD)                | 10.53 $\pm$ 4.98 | 8.21 $\pm$ 3.06  | 0.08   |
| All CBG readings (mmol/L, mean $\pm$ SD)                         | 10.60 $\pm$ 2.22 | 8.10 $\pm$ 1.19  | 0.001  |
| Glucose AM readings (mmol/L, mean $\pm$ SD)                      | 8.95 $\pm$ 2.43  | 7.27 $\pm$ 1.26  | <0.001 |
| Glucose PM readings (mmol/L, mean $\pm$ SD)                      | 12.34 $\pm$ 2.59 | 9.06 $\pm$ 1.47  | <0.001 |
| Highest glucose reading (mmol/L, mean $\pm$ SD)                  | 20.46 $\pm$ 4.32 | 13.10 $\pm$ 3.00 | <0.001 |
| Number of cancer treatment cycles (median, IQR)                  | 4 [2;6]          | 3 [1;5]          | 0.32   |
| Any change in cancer treatment plan during CBG monitoring, n (%) | 21 (31)          | 30 (35)          | 0.52   |
| Any change in steroid regimens during CBG monitoring, n (%)      | 21 (72)          | 30 (24)          | <0.001 |

---

Abbreviations: ADL= activities in daily living; AM= morning time; CBG= capillary blood glucose; CFS=clinical frailty scale; GOLD=geriatric oncology liaison development; PM=evening time; SD=standard deviation.
